# Supplementary material for: Enhanced Cycling Performance of Rechargeable Zinc–Air Flow Batteries Using Potassium Persulfate as Electrolyte Additive
Source: MDPI journal article supplement (doi:10.3390/ijms21197303), 2020-10-02
Supplement: s1 [file s1]

# Enhanced Cycling Performance of Rechargeable Zinc–Air Flow Batteries Using Potassium Persulfate as Electrolyte Additive

Ramin Khezri <sup>1</sup>, Soraya Hosseini <sup>1</sup>, Abhishek Lahiri <sup>2</sup>, Shiva Rezaei Motlagh <sup>3</sup>,  
Mai Thanh Nguyen <sup>4</sup>, Tetsu Yonezawa <sup>4,5</sup> and Soorathep Kheawhom <sup>1,6,\*</sup>

<sup>1</sup> Department of Chemical Engineering, Faculty of Engineering, Chulalongkorn University, Bangkok 10330, Thailand; ramin.k@chula.ac.th (R.K.); soraya.h@chula.ac.th (S.H.)

<sup>2</sup> Department of Chemical Engineering, Brunel University London, London UB8 3PH, United Kingdom; abhishek.lahiri@brunel.ac.uk

<sup>3</sup> Department of chemical engineering, faculty of engineering, Universiti Putra Malaysia, Selangor 43300, Malaysia; shiva.rezaei@student.upm.edu.my

<sup>4</sup> Division of Materials Science and Engineering, Faculty of Engineering, Hokkaido University, Hokkaido 060-8628, Japan; mai\_nt@eng.hokudai.ac.jp (M.T.N.); tetsu@eng.hokudai.ac.jp (T.Y.)

<sup>5</sup> Institute for the Promotion of Business-Regional Collaboration, Hokkaido University, Sapporo 001-0021, Japan

<sup>6</sup> Research Unit of Advanced Materials for Energy Storage, Chulalongkorn University, Bangkok 10330, Thailand

\* Correspondence: soorathep.k@chula.ac.th

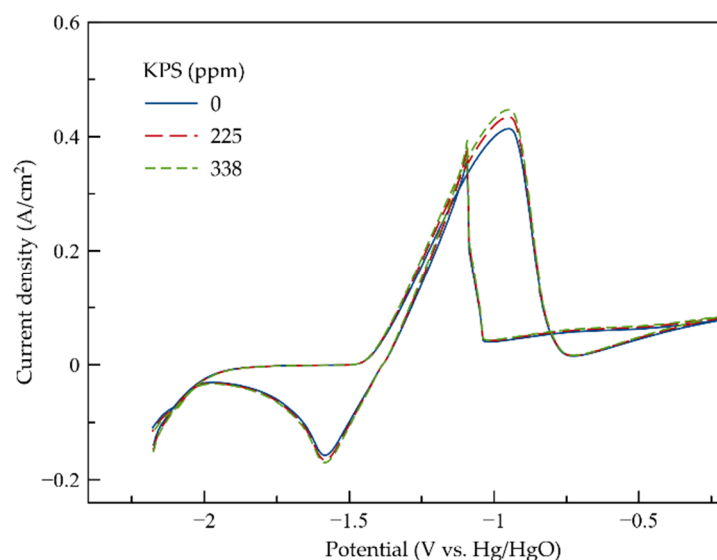

**Figure S1.** Cyclic voltammograms of Zn in a cell containing 0, 225 and 338 ppm KPS additive at scan rate 0.07 V/s.

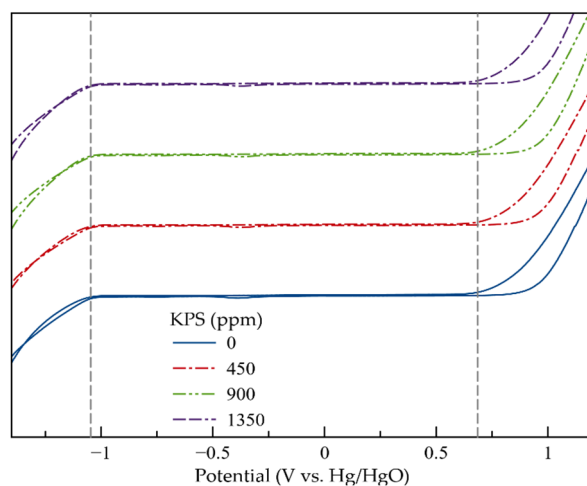

**Figure S2.** Electrochemical windows in the presence of 0, 450, 900 and 1350 ppm KPS additive.

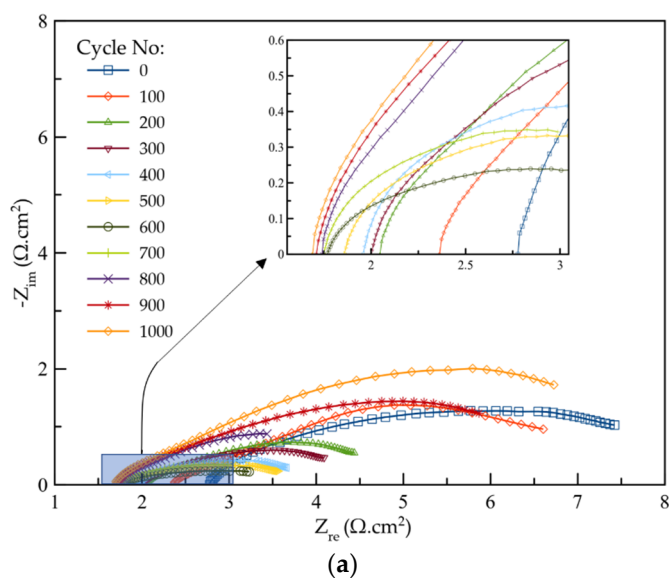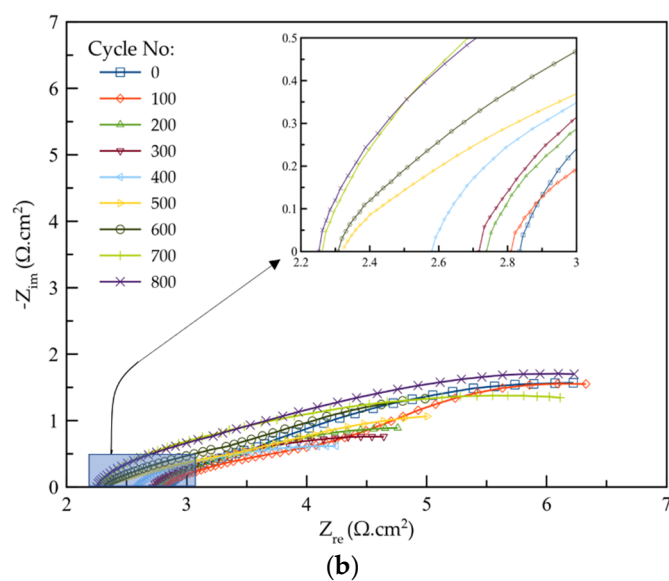

**Figure S3.** Nyquist plots of the cycling impact on the impedance of a cell containing (a) 900 ppm KPS and (b) 1350 ppm KPS additive to KOH/ZnO electrolyte at initial state and after every 100 charge/discharge cycle until the 800th cycle, at a frequency range from 100 kHz to 0.1 Hz, having an alternate current amplitude of 10 mV around OCV.

**Table S1.** Resistance values of cell impedance after every 100 cycles of CV for open cell with the electrolyte containing 900 ppm KPS.

| Concentration |                                   | Cycle Number |      |      |      |      |      |      |      |       |       |       |
|---------------|-----------------------------------|--------------|------|------|------|------|------|------|------|-------|-------|-------|
| KPS (ppm)     |                                   | 0            | 100  | 200  | 300  | 400  | 500  | 600  | 700  | 800   | 900   | 1000  |
| 900           | $R_s(\Omega)$<br>( $\pm 1\%$ )    | 2.77         | 2.36 | 2.04 | 2.00 | 1.95 | 1.85 | 1.76 | 1.75 | 1.74  | 1.71  | 1.69  |
|               | $R_{ct}(\Omega)$<br>( $\pm 1\%$ ) | 8.76         | 7.05 | 7.93 | 7.36 | 7.15 | 6.89 | 6.57 | 6.97 | 10.92 | 11.52 | 13.14 |

**Table S2.** Resistance values of cell impedance after every 100 cycles of CV for open cell with the electrolyte containing 1350 ppm KPS.

| Concentration |                                   | Cycle Number |       |      |      |      |      |       |       |       |     |      |
|---------------|-----------------------------------|--------------|-------|------|------|------|------|-------|-------|-------|-----|------|
| KPS (ppm)     |                                   | 0            | 100   | 200  | 300  | 400  | 500  | 600   | 700   | 800   | 900 | 1000 |
| 1350          | $R_s(\Omega)$<br>( $\pm 1\%$ )    | 2.83         | 2.81  | 2.73 | 2.71 | 2.57 | 2.32 | 2.30  | 2.26  | 2.25  | -   | -    |
|               | $R_{ct}(\Omega)$<br>( $\pm 1\%$ ) | 14.31        | 13.72 | 7.75 | 7.84 | 8.32 | 8.86 | 10.17 | 13.01 | 14.41 | -   | -    |
